# Supplementary material for: Reshaping the tumor microenvironment with oncolytic viruses, positive regulation of the immune synapse, and blockade of the immunosuppressive oncometabolic circuitry
Source: HighWire-hosted journal article supplement (doi:10.1136/jitc-2022-004935), 2022-07-01
Supplement: jitc-2022-004935supp003_data_supplement.xlsx [file jitc-2022-004935supp003_data_supplement.xlsx]

## Sheet: Treg
ENSEMBL
ENSMUSG00000076439
ENSMUSG00000075122
ENSMUSG00000071005
ENSMUSG00000070934
ENSMUSG00000068227
ENSMUSG00000068220
ENSMUSG00000066755
ENSMUSG00000063804
ENSMUSG00000059077
ENSMUSG00000056529
ENSMUSG00000055170
ENSMUSG00000055024
ENSMUSG00000050310
ENSMUSG00000048806
ENSMUSG00000045322
ENSMUSG00000044340
ENSMUSG00000042817
ENSMUSG00000042745
ENSMUSG00000040405
ENSMUSG00000040296
ENSMUSG00000039521
ENSMUSG00000038146
ENSMUSG00000037465
ENSMUSG00000036469
ENSMUSG00000034266
ENSMUSG00000033307
ENSMUSG00000032966
ENSMUSG00000032688
ENSMUSG00000032591
ENSMUSG00000032187
ENSMUSG00000032109
ENSMUSG00000032035
ENSMUSG00000031933
ENSMUSG00000031438
ENSMUSG00000031264
ENSMUSG00000030742
ENSMUSG00000030724
ENSMUSG00000030156
ENSMUSG00000029084
ENSMUSG00000029075
ENSMUSG00000028971
ENSMUSG00000028599
ENSMUSG00000028465
ENSMUSG00000027995
ENSMUSG00000027720
ENSMUSG00000027718
ENSMUSG00000027398
ENSMUSG00000027164
ENSMUSG00000026778
ENSMUSG00000026770
ENSMUSG00000026012
ENSMUSG00000026011
ENSMUSG00000026009
ENSMUSG00000025949
ENSMUSG00000025929
ENSMUSG00000025583
ENSMUSG00000025321
ENSMUSG00000025199
ENSMUSG00000024810
ENSMUSG00000024670
ENSMUSG00000024014
ENSMUSG00000022901
ENSMUSG00000022878
ENSMUSG00000022770
ENSMUSG00000021789
ENSMUSG00000021538
ENSMUSG00000021055
ENSMUSG00000020702
ENSMUSG00000020178
ENSMUSG00000020122
ENSMUSG00000020020
ENSMUSG00000019256
ENSMUSG00000016529
ENSMUSG00000016496
ENSMUSG00000015619
ENSMUSG00000004296
ENSMUSG00000004043
ENSMUSG00000004040
ENSMUSG00000003882
ENSMUSG00000003068
ENSMUSG00000002699
ENSMUSG00000002603
ENSMUSG00000002602
ENSMUSG00000001444
ENSMUSG00000001134
ENSMUSG00000000290
